# Supplementary material for: mTORC2–NDRG1–CDC42 axis couples fasting to mitochondrial fission
Source: PubMed Central journal article supplement (PMC10344787; doi:10.1038/s41556-023-01163-3), 2023-06-29

# Uncropped full-length pictures of IB membranes

Fig 3c. RICTOR

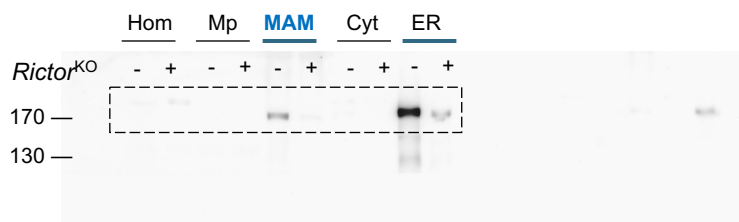

Fig 3c. MFN1

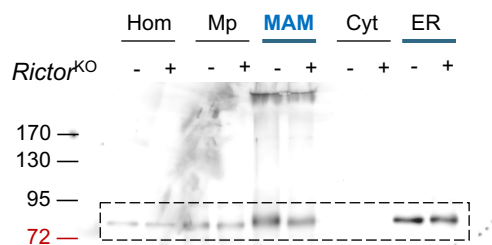

Fig 3c. MFN2

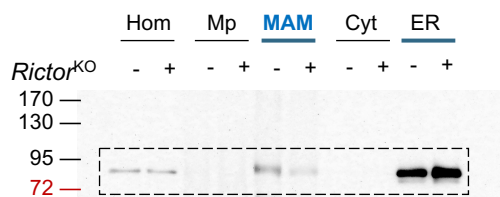

Fig 3c. OPA1

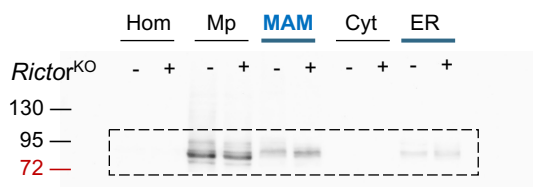

Fig 3c. P-DRP1<sup>Ser616</sup>

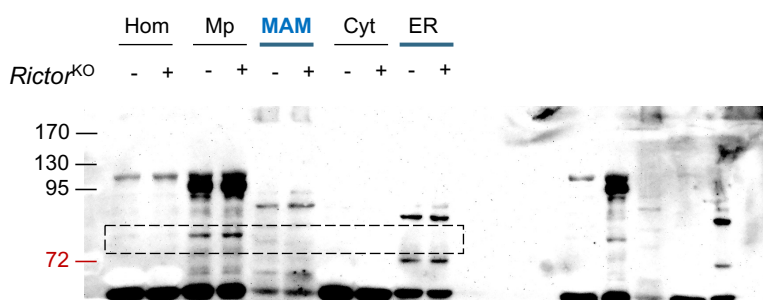

Fig 3c. P-DRP1<sup>Ser637</sup>

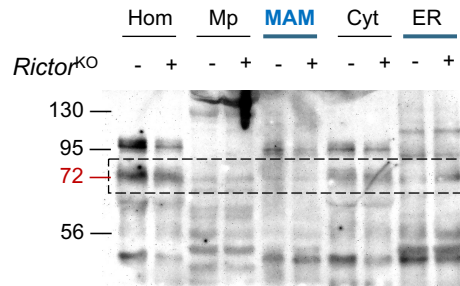

Fig 3c. DRP1

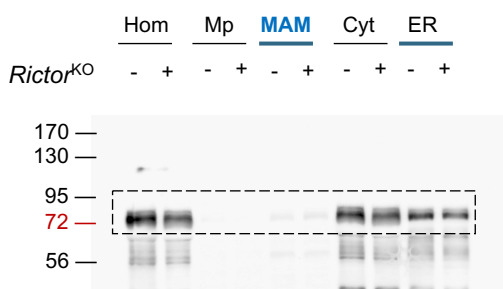

Fig 3c. MFF

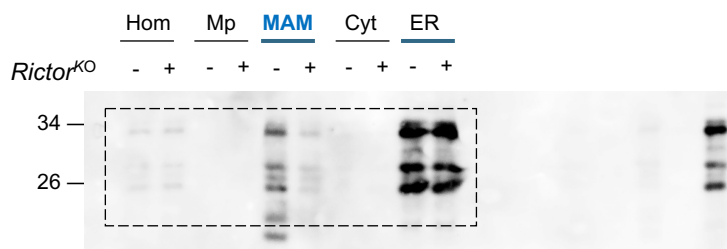

Fig 3c. CYT C

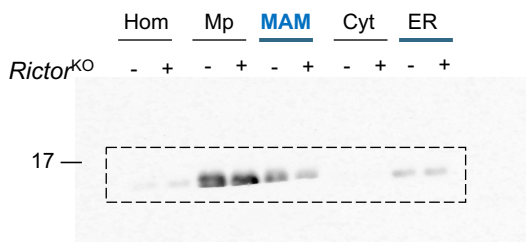

Fig 3c. PARKIN

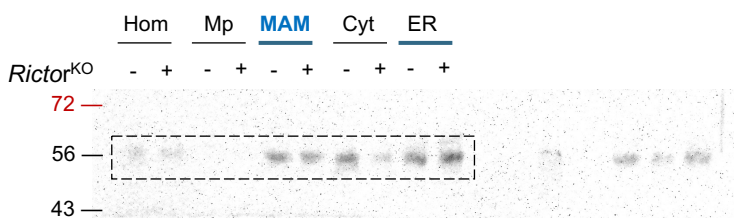

Fig 3c. CALRETICULIN

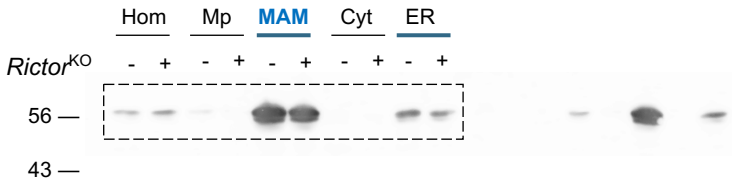

Fig 3c. Ponceau

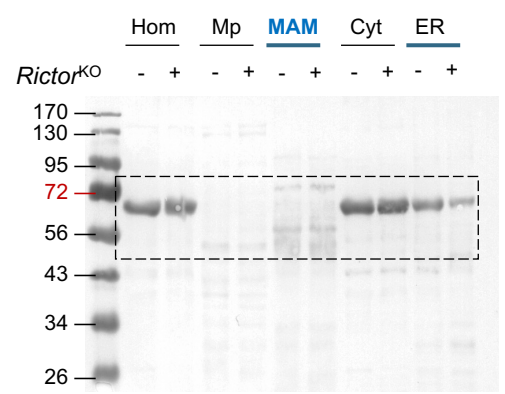

Fig 3c. FACL4

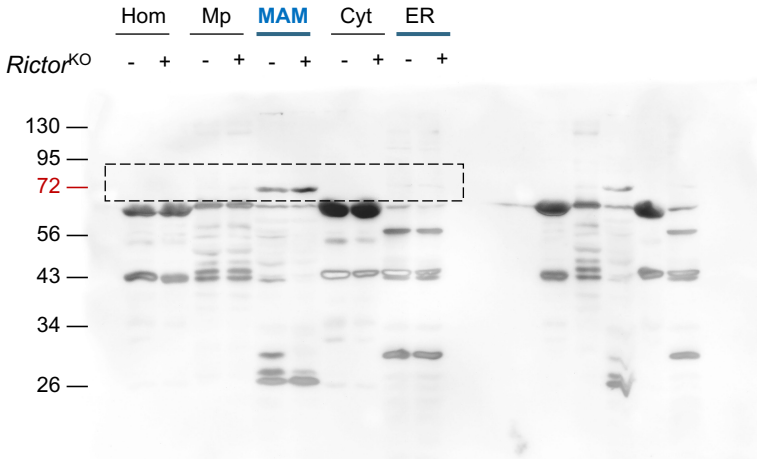

Fig 3c. TUBULIN

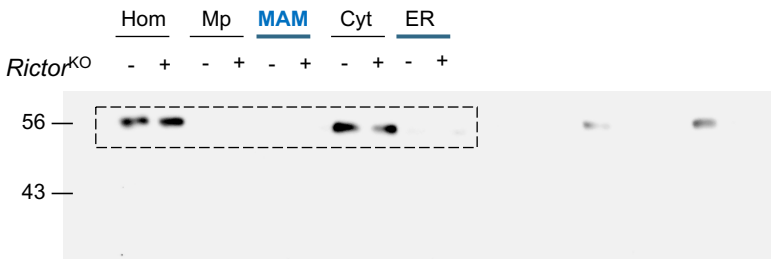

Fig 3e. DRP1

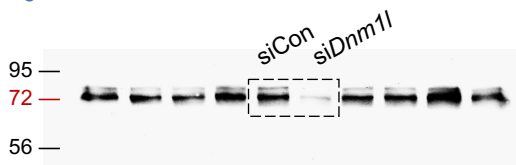

Fig 3e. RICTOR

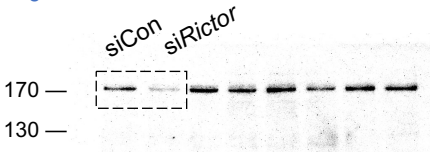

Fig 3e. Ponceau (siDnm1l)

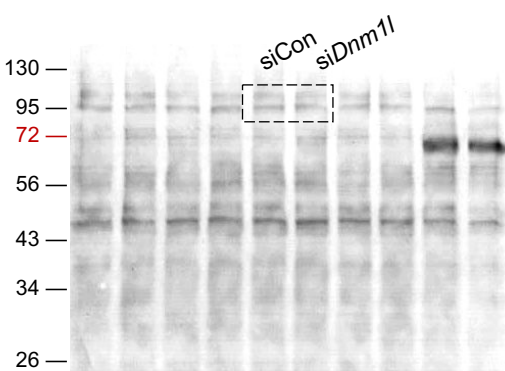

Fig 3e. Ponceau (siRictor)

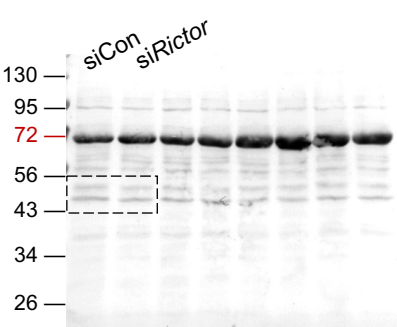

Supplement: 41556_2023_1163_MOESM21_ESM.pdf [file 41556_2023_1163_MOESM21_ESM.pdf]
