# Supplementary material for: mTORC2–NDRG1–CDC42 axis couples fasting to mitochondrial fission
Source: PubMed Central journal article supplement (PMC10344787; doi:10.1038/s41556-023-01163-3), 2023-06-29

# Uncropped full-length pictures of IB membranes

Extended Data Fig 2d. P-S6<sup>Ser235/236</sup>

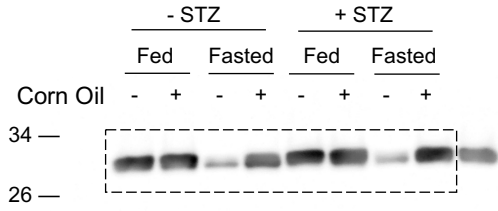

Extended Data Fig 2d. S6

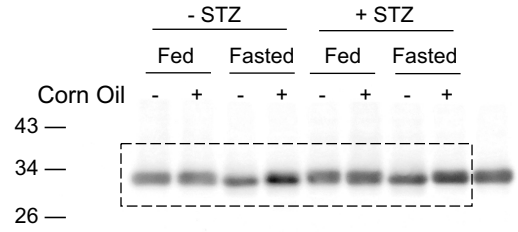

Extended Data Fig 2d. P-AKT<sup>Ser473</sup>

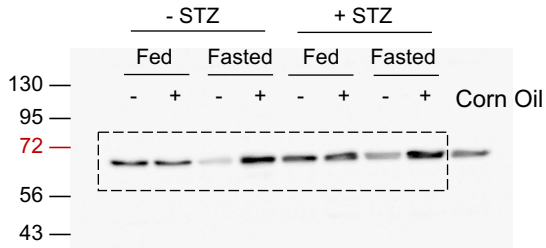

Extended Data Fig 2d. P-AKT<sup>Thr308</sup>

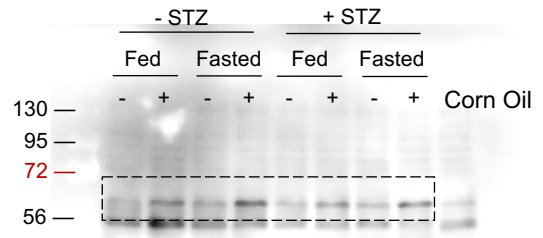

Extended Data Fig 2d. AKT

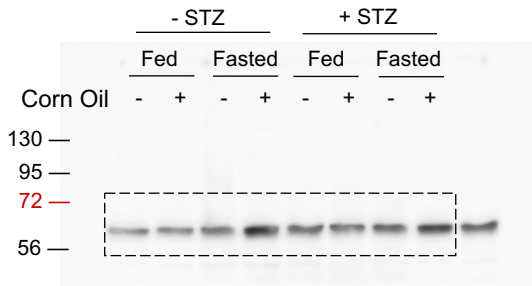

Extended Data Fig 2d. Ponceau

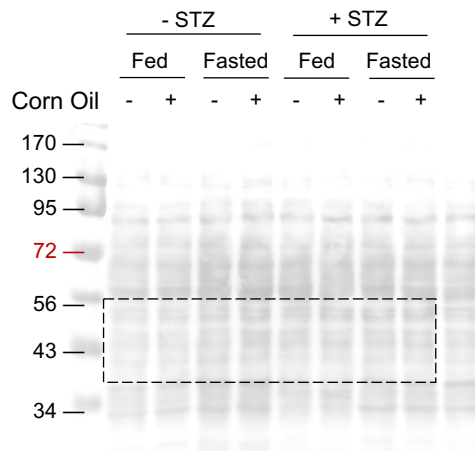

Extended Data Fig 2j. P-PKA<sup>Thr197</sup>

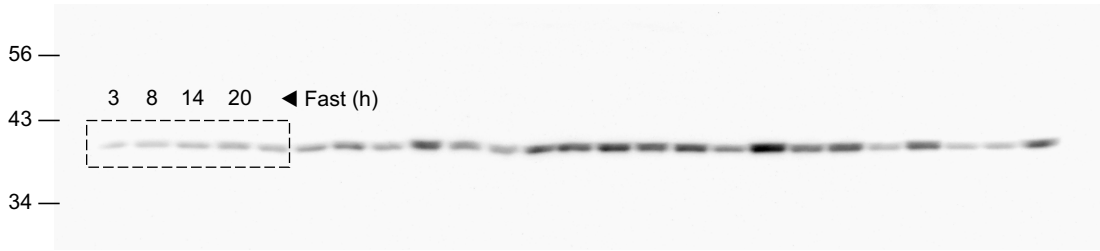

Extended Data Fig 2j. PKA

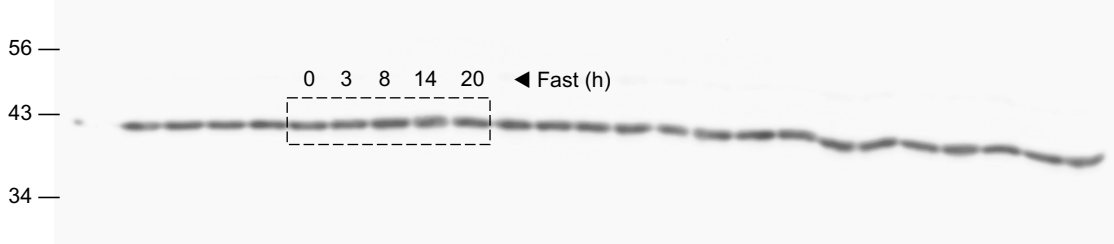

Extended Data Fig 2j. P-PKC $\alpha$ / $\beta$ II<sup>Thr638/641</sup>

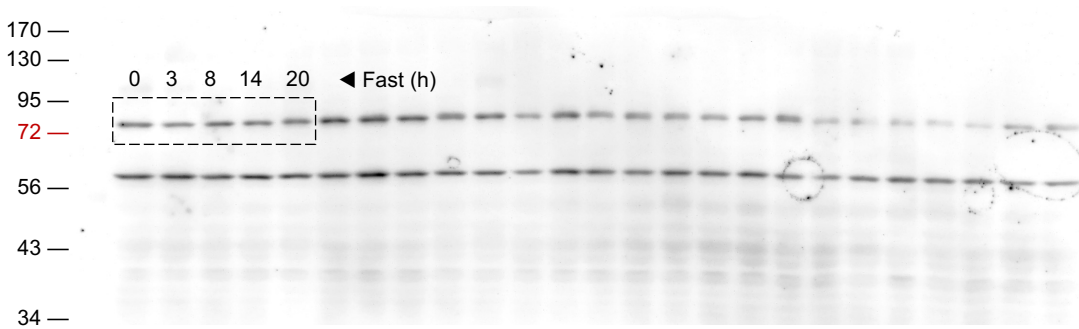

Extended Data Fig 2j. PKC $\alpha$

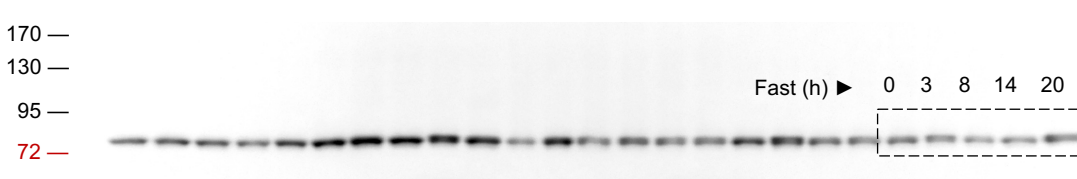

Extended Data Fig 2j. P-PKC $\delta$ <sup>Thr505</sup>

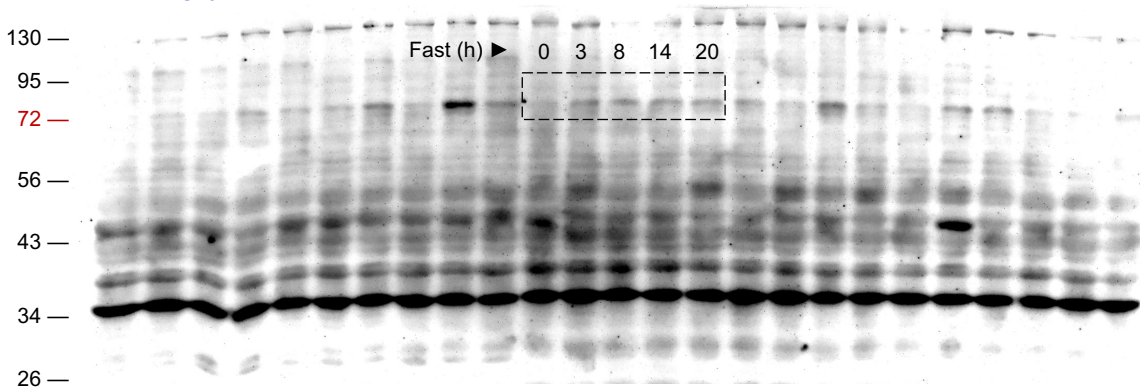

Extended Data Fig 2j. P-PKC $\delta$ / $\theta$ <sup>S643/676</sup>

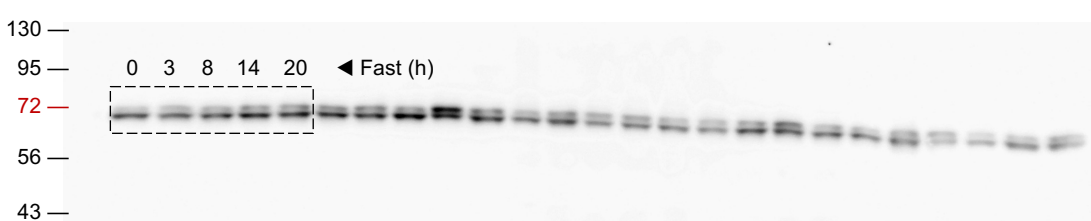

Extended Data Fig 2j. PKC $\delta$

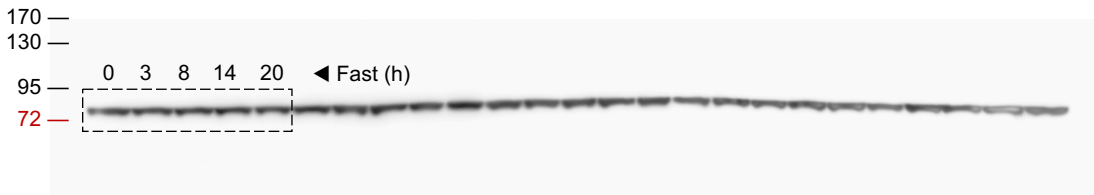

Extended Data Fig 2j. P-PKC $\zeta/\Lambda^{\text{Thr410/403}}$

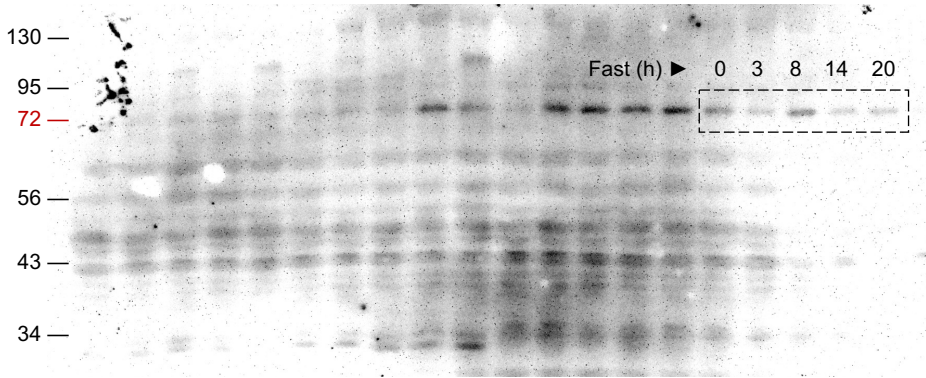

Extended Data Fig 2j. PKC $\zeta$

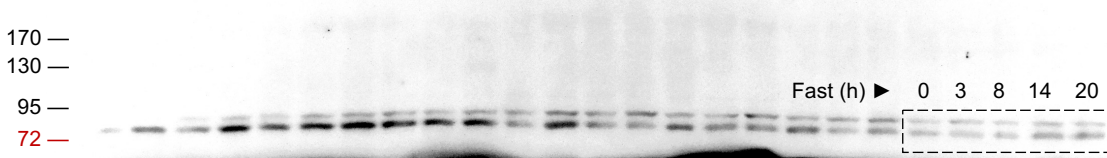

Extended Data Fig 2j. Ponceau

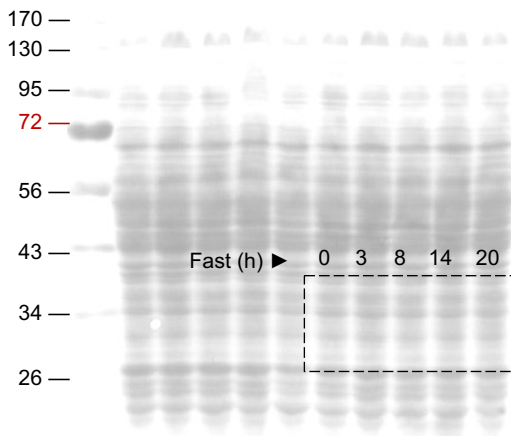

Supplement: 41556_2023_1163_MOESM26_ESM.pdf [file 41556_2023_1163_MOESM26_ESM.pdf]
