# Supplementary material for: mTORC2–NDRG1–CDC42 axis couples fasting to mitochondrial fission
Source: PubMed Central journal article supplement (PMC10344787; doi:10.1038/s41556-023-01163-3), 2023-06-29

# Uncropped full-length pictures of IB membranes

Extended Data Fig 3a. TSC1

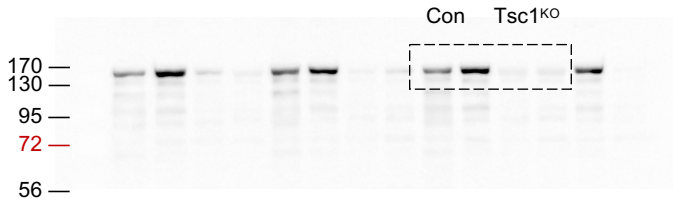

Extended Data Fig 3b. RAPTOR

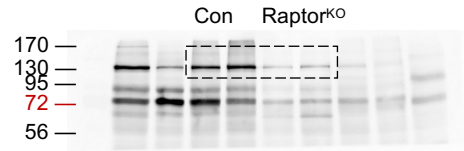

Extended Data Fig 3a. Ponceau (TSC1)

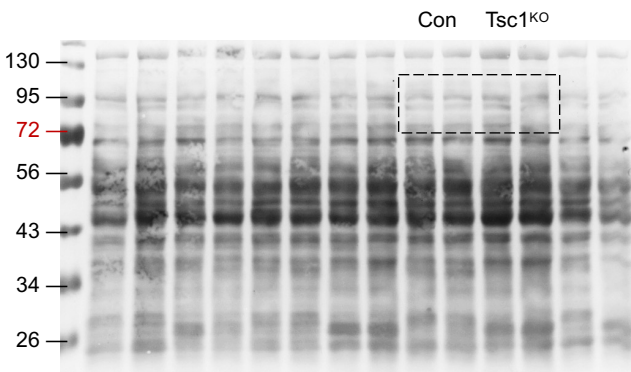

Extended Data Fig 3b. Ponceau (RAPTOR)

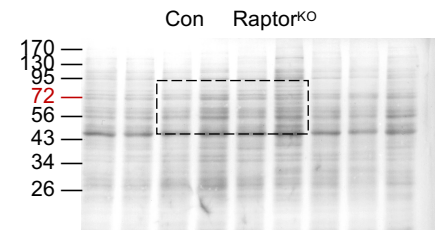

Extended Data Fig 3c. RICTOR (Liver)

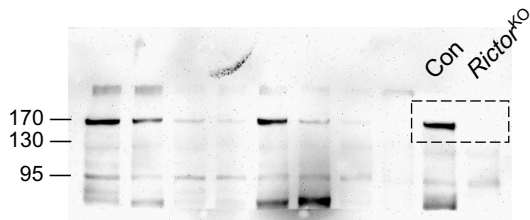

Extended Data Fig 3c. P-AKT<sup>Ser473</sup> (Liver)

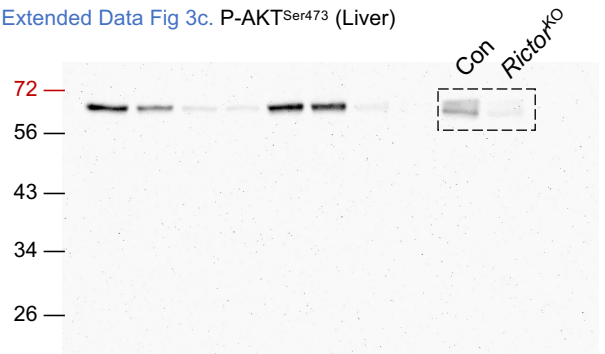

Extended Data Fig 3c. AKT (Liver)

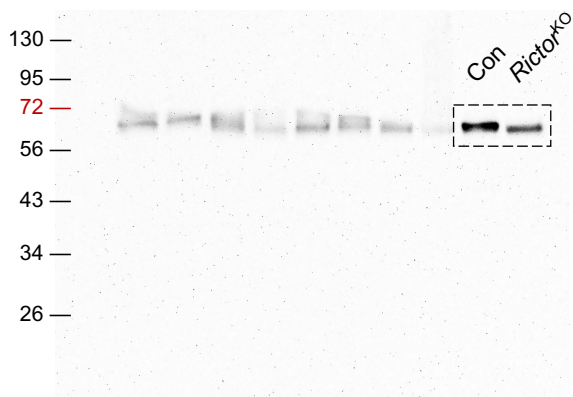

Extended Data Fig 3c. Ponceau (Liver)

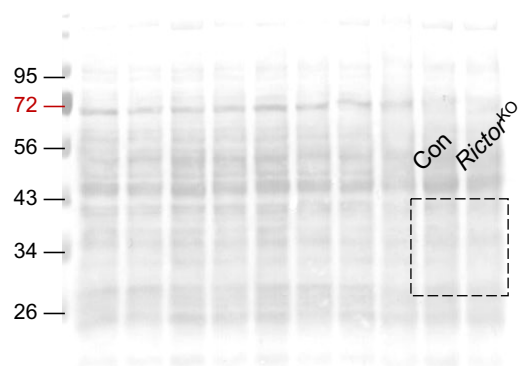

Extended Data Fig 3c. RICTOR (eWAT)

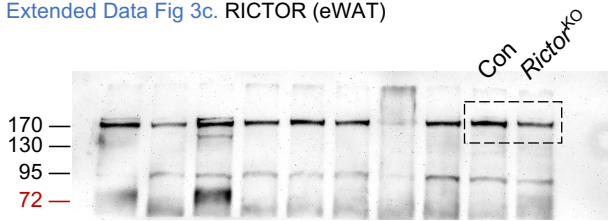

Extended Data Fig 3c. P-AKT<sup>Ser473</sup> (eWAT)

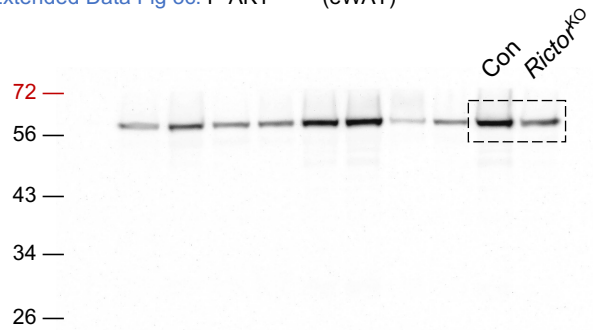

Extended Data Fig 3c. AKT (eWAT)

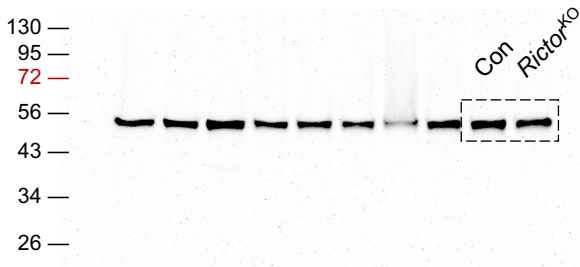

Extended Data Fig 3c. Ponceau (eWAT)

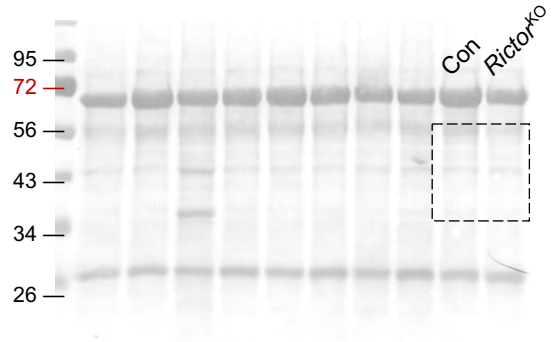

Extended Data Fig 3c. RICTOR (Soleus)

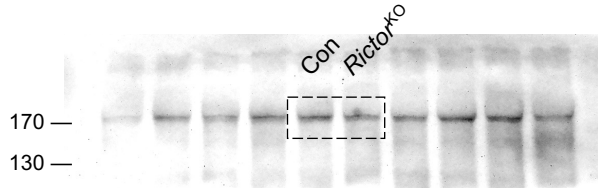

Extended Data Fig 3c. P-AKT<sup>Ser473</sup> (Soleus)

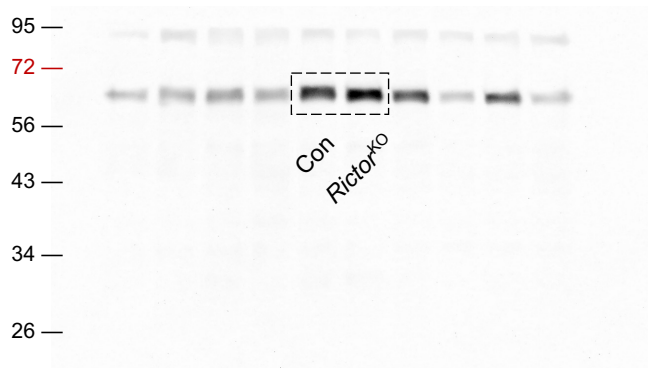

Extended Data Fig 3c. AKT (Soleus)

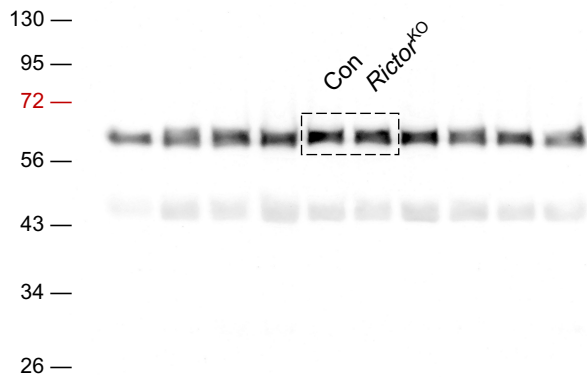

Extended Data Fig 3c. Ponceau (Soleus)

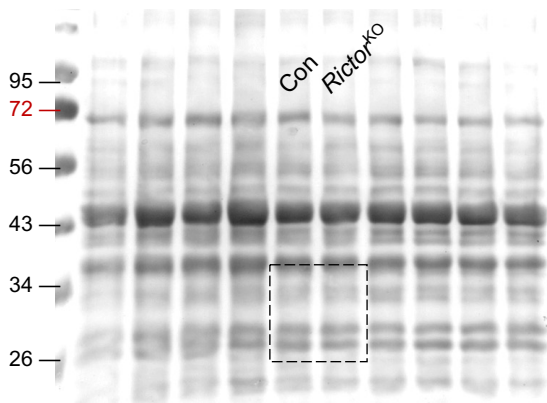

Supplement: 41556_2023_1163_MOESM27_ESM.pdf [file 41556_2023_1163_MOESM27_ESM.pdf]
