# Supplementary material for: mTORC2–NDRG1–CDC42 axis couples fasting to mitochondrial fission
Source: PubMed Central journal article supplement (PMC10344787; doi:10.1038/s41556-023-01163-3), 2023-06-29

# Uncropped full-length pictures of IB membranes

Fig 1h. P-P70<sup>Thr389</sup>

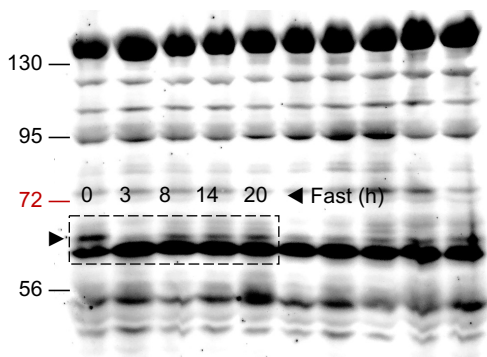

Fig 1h. P70

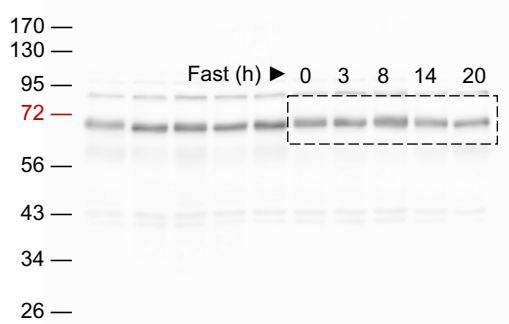

Fig 1h. P-S6<sup>Ser235/236</sup>

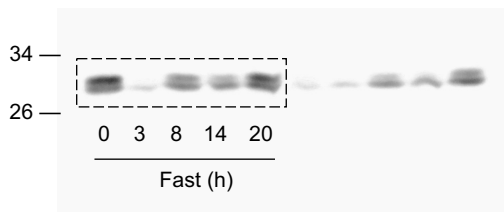

Fig 1h. S6

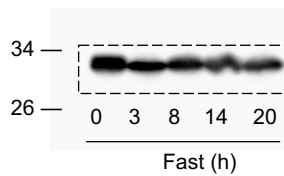

Fig 1h. P-AKT<sup>Ser473</sup>

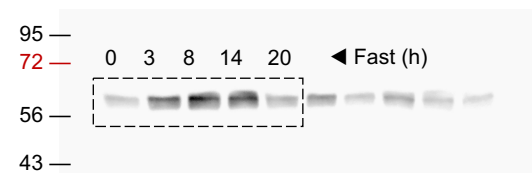

Fig 1h. P-AKT<sup>Thr308</sup>

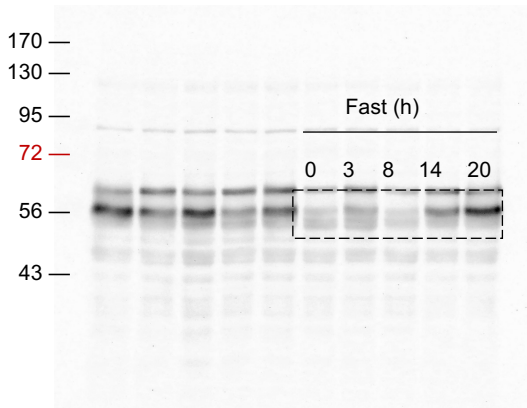

Fig 1h. AKT

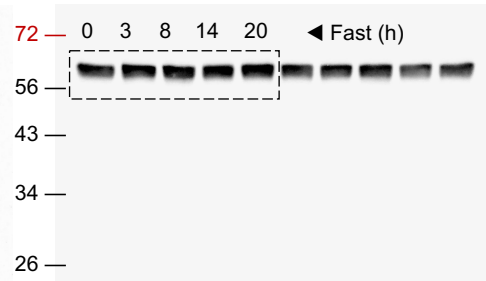

Fig 1h. P-SGK1<sup>Thr256</sup>

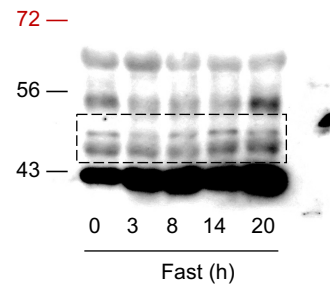

Fig 1h. SGK1

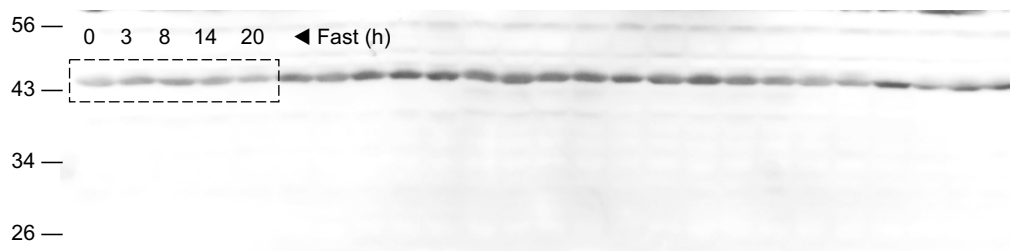

Fig 1h. P-NDRG1<sup>Thr346</sup>

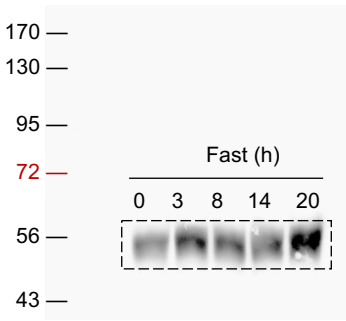

Fig 1h. NDRG1

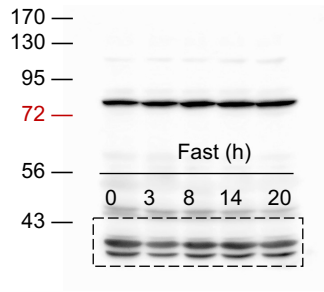

Fig 1h. Ponceau

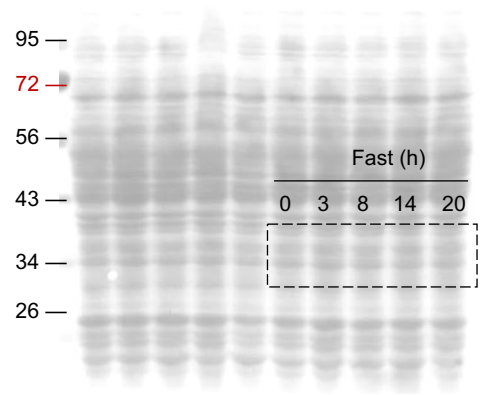

Supplement: 41556_2023_1163_MOESM19_ESM.pdf [file 41556_2023_1163_MOESM19_ESM.pdf]
