# Supplementary material for: mTORC2–NDRG1–CDC42 axis couples fasting to mitochondrial fission
Source: PubMed Central journal article supplement (PMC10344787; doi:10.1038/s41556-023-01163-3), 2023-06-29

# Uncropped full-length pictures of IB membranes

Fig 4i. MFF

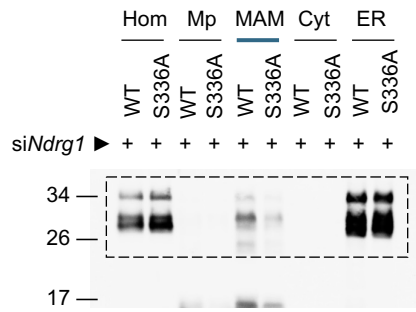

Fig 4i. VDAC1

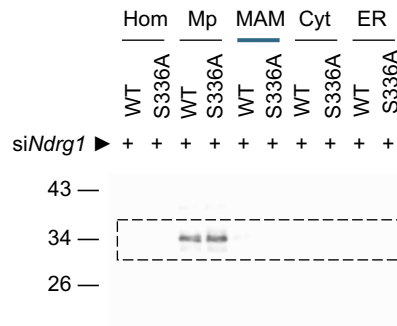

Fig 4i. FACL4

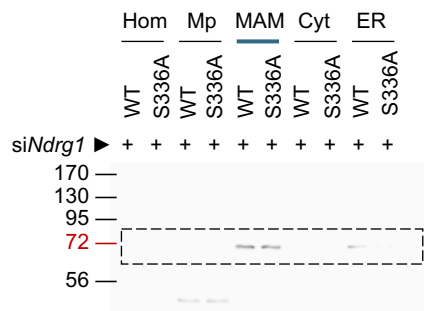

Fig 4i. CALRETICULIN

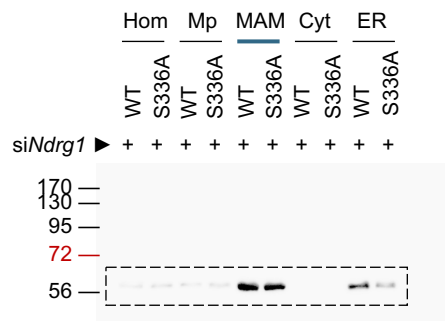

Fig 4i. TUBULIN

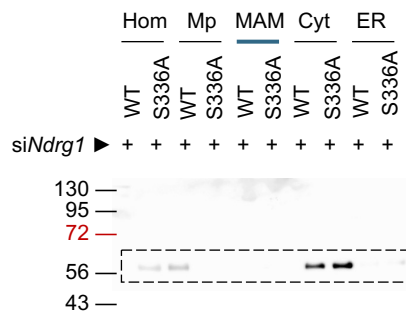

Fig 4i. Ponceau

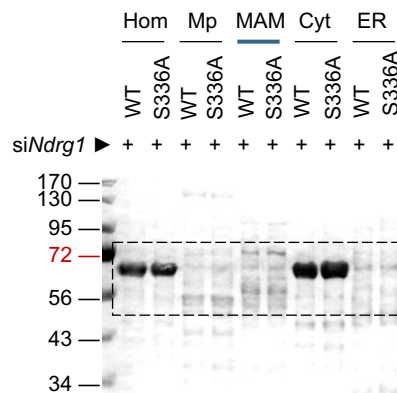

Supplement: 41556_2023_1163_MOESM22_ESM.pdf [file 41556_2023_1163_MOESM22_ESM.pdf]
