# Supplementary material for: mTORC2–NDRG1–CDC42 axis couples fasting to mitochondrial fission
Source: PubMed Central journal article supplement (PMC10344787; doi:10.1038/s41556-023-01163-3), 2023-06-29

# Uncropped full-length pictures of IB membranes

Extended Data 1e. RAPTOR

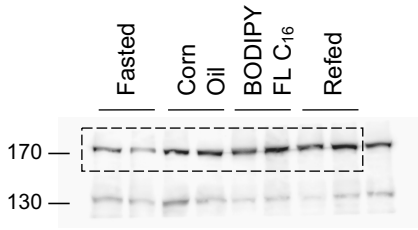

Extended Data 1e. RICTOR

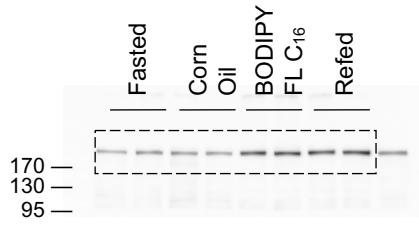

Extended Data 1e. P-P70<sup>Thr389</sup>

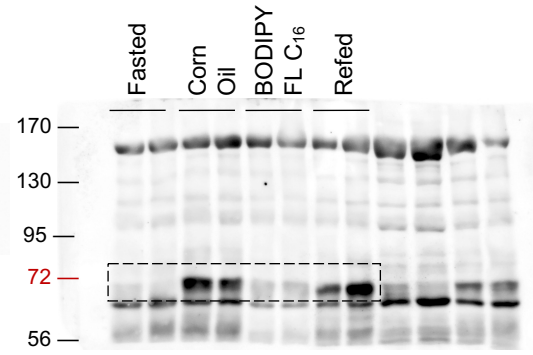

Extended Data 1e. P70

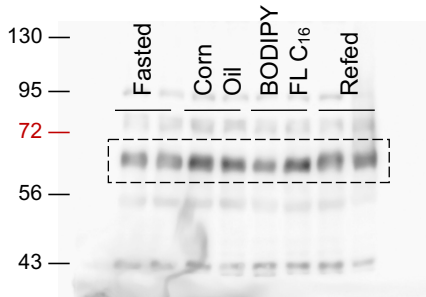

Extended Data 1e. P-S6<sup>Ser235/236</sup>

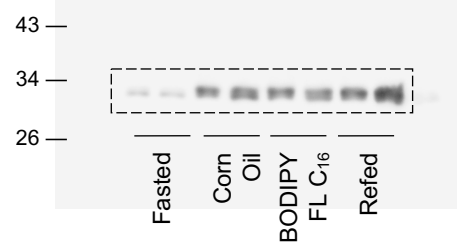

Extended Data 1e. S6

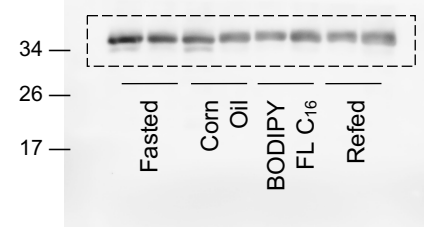

Extended Data 1e. P-AKT<sup>Ser473</sup>

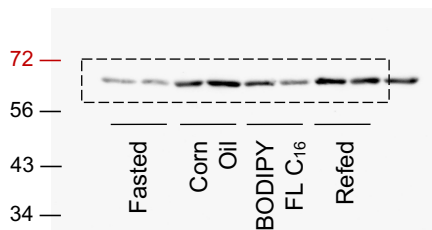

Extended Data 1e. P-AKT<sup>Thr308</sup>

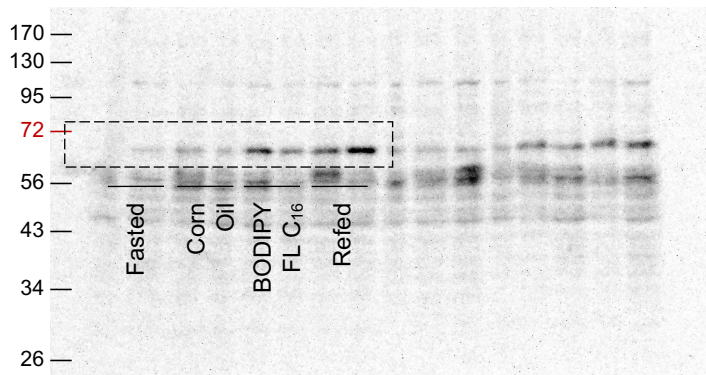

Extended Data 1e. AKT

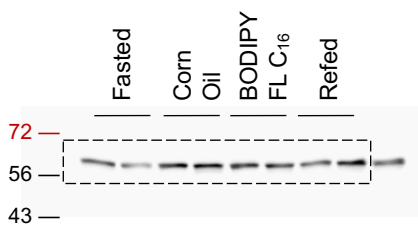

Extended Data 1e. P-AMPK $\alpha$ <sup>Thr172</sup>

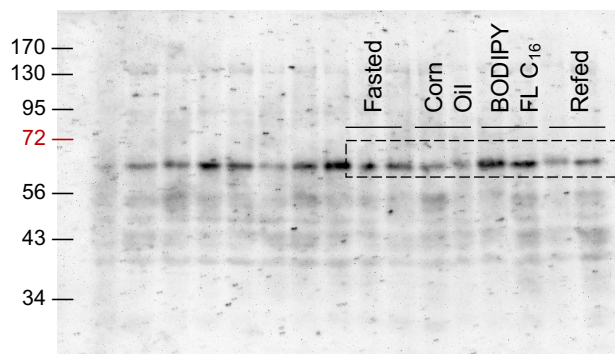

Extended Data 1e. Ponceau

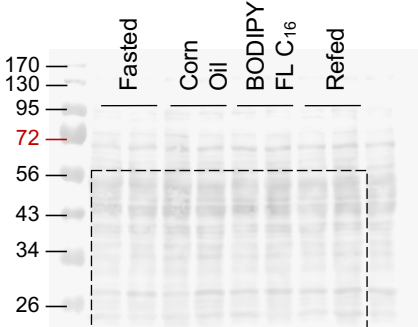

Extended Data 1e. AMPK $\alpha$

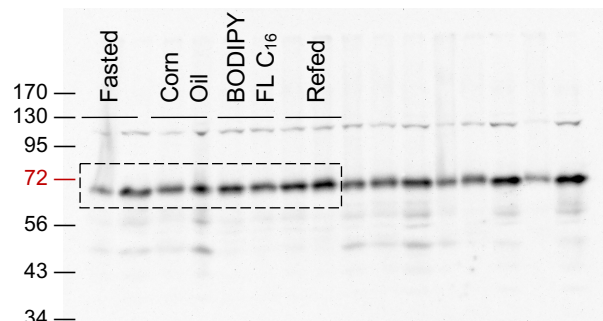

Supplement: 41556_2023_1163_MOESM25_ESM.pdf [file 41556_2023_1163_MOESM25_ESM.pdf]
