# Supplementary material for: mTORC2–NDRG1–CDC42 axis couples fasting to mitochondrial fission
Source: PubMed Central journal article supplement (PMC10344787; doi:10.1038/s41556-023-01163-3), 2023-06-29

# Uncropped full-length pictures of IB membranes

Extended Data Fig 4d. VDAC1

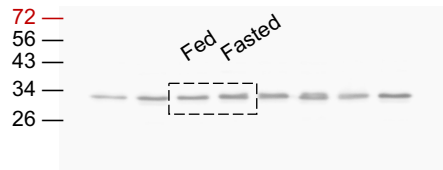

Extended Data Fig 4d. CYT C

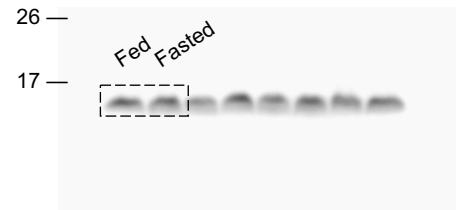

Extended Data Fig 4d. Ponceau

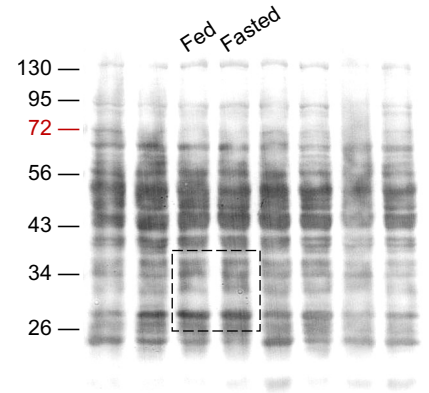

Supplement: 41556_2023_1163_MOESM28_ESM.pdf [file 41556_2023_1163_MOESM28_ESM.pdf]
