# Supplementary material for: mTORC2–NDRG1–CDC42 axis couples fasting to mitochondrial fission
Source: PubMed Central journal article supplement (PMC10344787; doi:10.1038/s41556-023-01163-3), 2023-06-29

# Uncropped full-length pictures of IB membranes

Extended Data Fig 6g. NDRG1

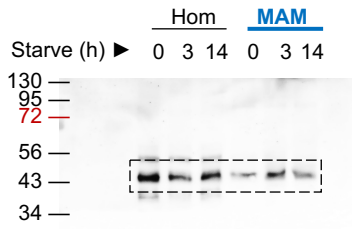

Extended Data Fig 6g. CALRETICULIN

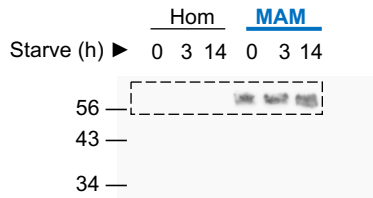

Extended Data Fig 6g. FACL4

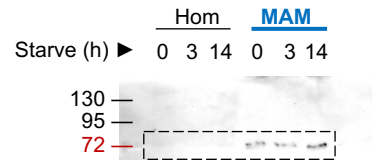

Extended Data Fig 6g. TUBULIN

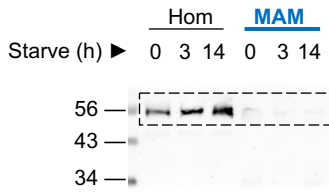

Extended Data Fig 6g. Ponceau

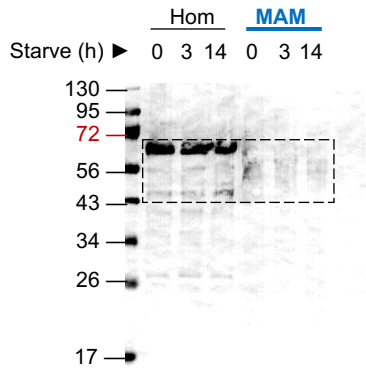

Supplement: 41556_2023_1163_MOESM30_ESM.pdf [file 41556_2023_1163_MOESM30_ESM.pdf]
