# Supplementary material for: mTORC2–NDRG1–CDC42 axis couples fasting to mitochondrial fission
Source: PubMed Central journal article supplement (PMC10344787; doi:10.1038/s41556-023-01163-3), 2023-06-29

# Uncropped full-length pictures of IB membranes

Extended Data Fig 7b. FLAG

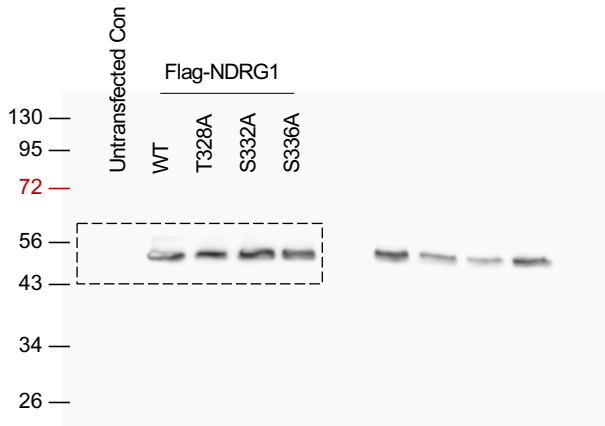

Extended Data Fig 7b. Ponceau

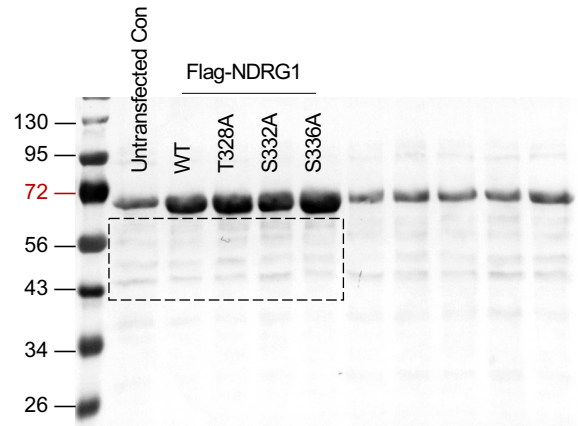

Extended Data Fig 7i. NDRG1

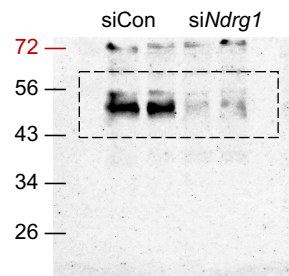

Extended Data Fig 7i. Ponceau

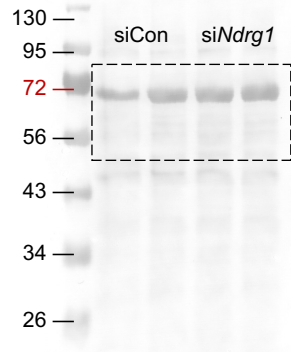

Supplement: 41556_2023_1163_MOESM31_ESM.pdf [file 41556_2023_1163_MOESM31_ESM.pdf]
