# Supplementary material for: mTORC2–NDRG1–CDC42 axis couples fasting to mitochondrial fission
Source: PubMed Central journal article supplement (PMC10344787; doi:10.1038/s41556-023-01163-3), 2023-06-29

# Uncropped full-length pictures of IB membranes

Extended Data Fig 9a. DRP1

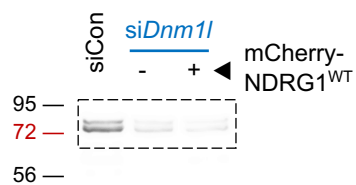

Extended Data Fig 9a. mCherry-NDRG1

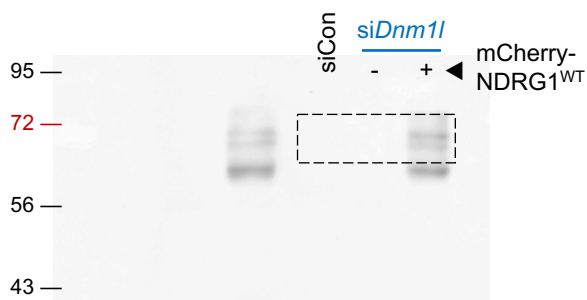

Extended Data Fig 9a. Ponceau

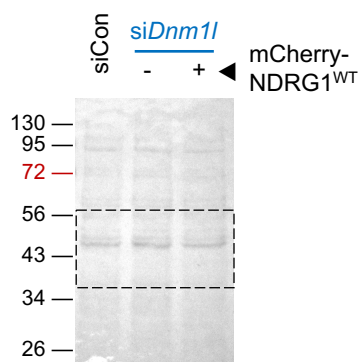

Extended Data Fig 9b. MFF

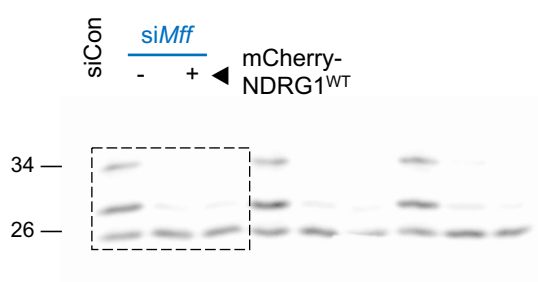

Extended Data Fig 9b. mCherry-NDRG1

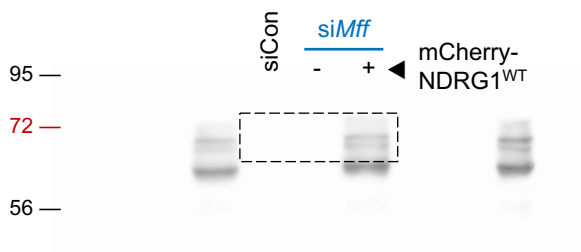

Extended Data Fig 9b. Ponceau

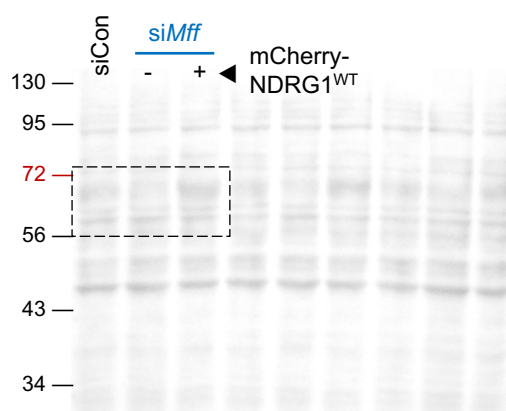

Extended Data Fig 9c. FLAG

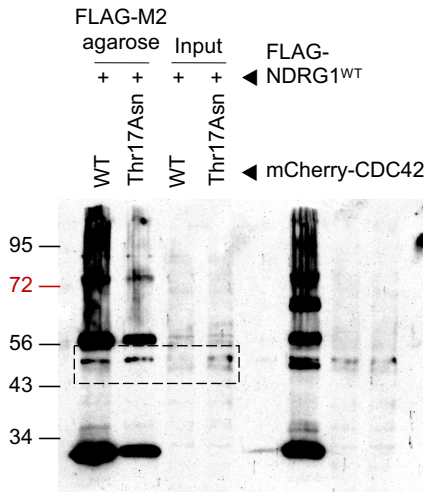

Extended Data Fig 9c. mCherry-Cdc42

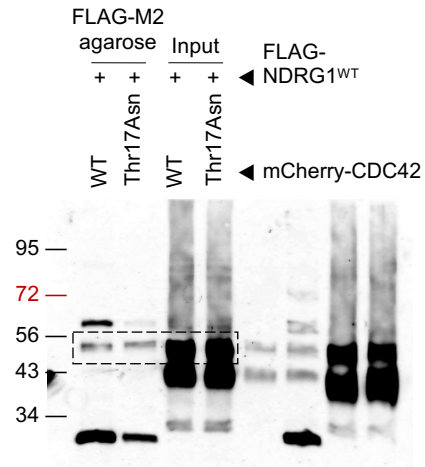

Extended Data Fig 9c. Ponceau

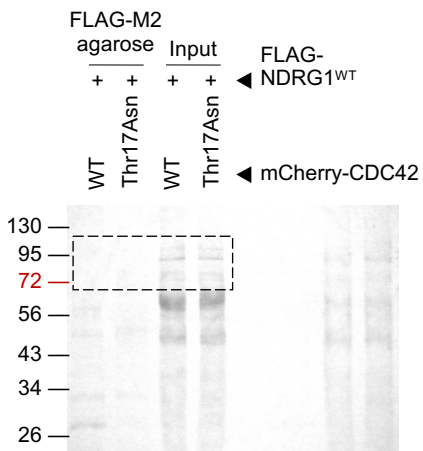

Extended Data Fig 9d. CDC42

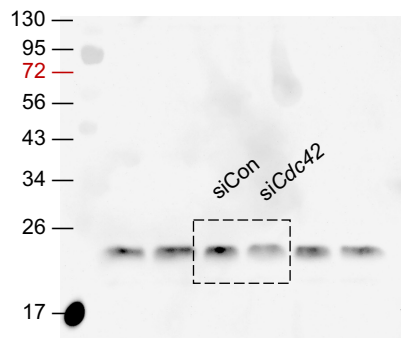

Extended Data Fig 9d. Ponceau

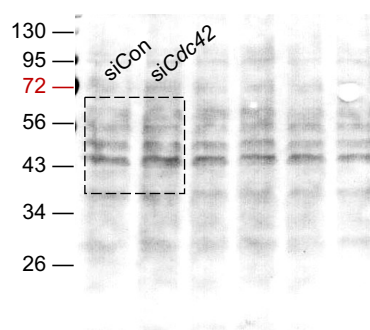

Supplement: 41556_2023_1163_MOESM33_ESM.pdf [file 41556_2023_1163_MOESM33_ESM.pdf]
